# Supplementary material for: Metabolomic Study of High-Fat Diet-Induced Obese (DIO) and DIO Plus CCl4-Induced NASH Mice and the Effect of Obeticholic Acid
Source: MDPI journal article supplement (doi:10.3390/metabo11060374), 2021-06-10
Supplement: s1 [file s1]

**Table S1.** Primer sequences used for real-time PCR of mouse liver tissues.

| Genes          | Forward sequences (5' to 3' ) | Reverse sequences (5' to 3' ) |
|----------------|-------------------------------|-------------------------------|
| Col-1a1        | ACCTGTGTGTTCCCTACTCA          | GACTGTTGCCTTCGCCTCTG          |
| MCP-1          | GCAGCCTGAAGAGTGGTACTCTC       | CATTAGCCAACATTCCCATCTC        |
| Cyclin D1      | GCACAACGCACTTTCTTTCCA         | CGCAGGCTTGACTCCAGAAG          |
| CDK1           | AGAAGGTACTTACGGTGTGGT         | GAGAGATTTCCCGAATTGCAGT        |
| CDK2           | CCTGCTCATTAAATGCAGAGGG        | GTGCTGGGTACACACTAGGTG         |
| CDK4           | ATGGCTGCCACTCGATATGAA         | TCCTCCATTAGGAAGTCTCACAC       |
| $\beta$ -actin | GGCTGTATTCCTCCATCG            | CCAGTTGGTAACAATGCCATGT        |

**Table S2.** Summary of differential metabolites in serum between different groups.

| Metabolite    | DIO vs Control |         |        | DIO-CCl <sub>4</sub> vs DIO |         |        | DIO-CCl <sub>4</sub> vs Control |         |        |
|---------------|----------------|---------|--------|-----------------------------|---------|--------|---------------------------------|---------|--------|
|               | Log2 FC        | p value | Change | Log2 FC                     | p value | Change | Log2 FC                         | p value | Change |
| Glutamic.acid | -1.06          | 0.002   | ↓      | 0.17                        | 0.35    | -      | -0.89                           | 0.01    | ↓      |
| Carnosine     | 0.67           | 0.001   | ↑      | 0.15                        | 0.13    | -      | 0.82                            | 0.001   | ↑      |
| PC.aa.C34.2   | 0.31           | 0.02    | -      | 0.37                        | 0.01    | -      | 0.67                            | 0.00005 | ↑      |
| PC.aa.C36.2   | 0.47           | 0.002   | -      | 0.24                        | 0.09    | -      | 0.71                            | 0.0001  | ↑      |
| PC.aa.C42.6   | 0.86           | 0.0001  | ↑      | -0.06                       | 0.63    | -      | 0.79                            | 0.0001  | ↑      |
| PC.ae.C38.2   | 0.80           | 0.00002 | ↑      | 0.17                        | 0.11    | -      | 0.97                            | 0.00001 | ↑      |
| PC.ae.C40.3   | 0.63           | 0.001   | -      | 0.04                        | 0.70    | -      | 0.67                            | 0.001   | ↑      |

**Table S3.** Summary of differential metabolites in intestine content between different groups.

| Metabolite           | DIO vs Normal |         |        | DIO-CCl <sub>4</sub> vs DIO |         |        | DIO-CCl <sub>4</sub> vs Normal |         |        |
|----------------------|---------------|---------|--------|-----------------------------|---------|--------|--------------------------------|---------|--------|
|                      | Log2 FC       | p value | Change | Log2 FC                     | p value | Change | Log2 FC                        | P value | Change |
| citulline            | 1.15          | 0.05    | -      | 0.15                        | 0.88    | -      | 1.30                           | 0.002   | ↑      |
| glycine              | 0.43          | 0.21    | -      | 0.57                        | 0.14    | -      | 1.01                           | 0.001   | ↑      |
| Isoleucine           | 0.61          | 0.16    | -      | 0.49                        | 0.24    | -      | 1.10                           | 0.001   | ↑      |
| leucine              | 0.51          | 0.22    | -      | 0.38                        | 0.40    | -      | 0.89                           | 0.002   | ↑      |
| lysine               | 0.60          | 0.16    | -      | 0.54                        | 0.22    | -      | 1.14                           | 0.0002  | ↑      |
| methionine           | 0.72          | 0.16    | ↑      | 0.25                        | 0.68    | ↑      | 0.97                           | 0.01    | ↑      |
| phenylalanine        | 0.53          | 0.22    | -      | 0.42                        | 0.40    | -      | 0.96                           | 0.002   | ↑      |
| serine               | 0.65          | 0.09    | ↑      | 0.60                        | 0.10    | -      | 1.25                           | 0.0004  | ↑      |
| threonine            | 0.32          | 0.36    | -      | 0.54                        | 0.22    | -      | 0.86                           | 0.002   | ↑      |
| tryptophan           | 1.10          | 0.14    | ↑      | 0.24                        | 0.82    | -      | 1.34                           | 0.001   | ↑      |
| tyrosine             | 0.54          | 0.24    | -      | 0.30                        | 0.63    | -      | 0.84                           | 0.004   | ↑      |
| valine               | 0.77          | 0.13    | ↑      | 0.41                        | 0.43    | -      | 1.17                           | 0.001   | ↑      |
| methionine.sulfoxide | 0.44          | 0.19    | -      | 0.30                        | 0.43    | -      | 0.74                           | 0.002   | ↑      |
| lysoPC.a.C14.0       | 0.55          | 0.003   | -      | 0.40                        | 0.003   | -      | 0.95                           | 0.0001  | ↑      |
| lysoPC.a.C16.0       | 0.91          | 0.09    | ↑      | 0.91                        | 0.04    | ↑      | 1.82                           | 0.001   | ↑      |
| lysoPC.a.C17.0       | -0.28         | 0.88    | -      | 1.06                        | 0.01    | ↑      | 0.79                           | 0.02    | ↑      |
| lysoPC.a.C18.0       | -0.07         | 0.72    | -      | 1.76                        | 0.01    | ↑      | 1.68                           | 0.002   | ↑      |
| lysoPC.a.C18.1       | 0.24          | 0.30    | -      | 0.42                        | 0.05    | -      | 0.66                           | 0.003   | ↑      |
| lysoPC.a.C20.4       | 1.06          | 0.01    | ↑      | -0.02                       | 0.88    | -      | 1.03                           | 0.002   | ↑      |
| lysoPC.a.C24.0       | -1.49         | 0.01    | ↓      | 0.38                        | 0.01    | -      | -1.12                          | 0.01    | ↓      |
| lysoPC.a.C26.0       | -1.54         | 0.003   | ↓      | 0.38                        | 0.11    | -      | -1.16                          | 0.01    | ↓      |
| lysoPC.a.C26.1       | -1.29         | 0.01    | ↓      | 0.14                        | 0.43    | -      | -1.15                          | 0.01    | ↓      |
| PC.aa.C28.1          | 0.66          | 0.03    | ↑      | 2.86                        | 0.003   | ↑      | 3.52                           | 0.003   | ↑      |
| PC.aa.C30.0          | 0.56          | 0.04    | -      | 2.13                        | 0.001   | ↑      | 2.69                           | 0.001   | ↑      |
| PC.aa.C32.0          | 0.85          | 0.11    | ↑      | 1.16                        | 0.01    | ↑      | 2.01                           | 0.00003 | ↑      |
| PC.aa.C34.4          | -1.34         | 0.01    | ↓      | 0.09                        | 0.69    | -      | -1.25                          | 0.01    | ↓      |
| PC.aa.C36.1          | -0.48         | 0.39    | -      | 1.55                        | 0.004   | ↑      | 1.08                           | 0.02    | ↑      |
| PC.aa.C36.5          | -1.86         | 0.01    | ↓      | -0.22                       | 0.22    | -      | -2.08                          | 0.01    | ↓      |
| PC.aa.C38.0          | 0.41          | 0.06    | -      | 0.44                        | 0.08    | -      | 0.85                           | 0.004   | ↑      |
| PC.aa.C40.4          | -0.13         | 0.84    | -      | -0.96                       | 0.04    | ↓      | -1.08                          | 0.03    | ↓      |
| PC.ae.C30.0          | -0.14         | 0.73    | -      | 0.90                        | 0.001   | ↑      | 0.76                           | 0.001   | ↑      |
| PC.ae.C34.3          | -2.08         | 0.03    | ↓      | -0.16                       | 0.63    | -      | -2.24                          | 0.03    | ↓      |
| PC.ae.C36.0          | 0.24          | 0.12    | -      | 1.40                        | 0.004   | ↑      | 1.64                           | 0.001   | ↑      |
| PC.ae.C36.1          | -0.12         | 0.68    | -      | 1.55                        | 0.01    | ↑      | 1.43                           | 0.01    | ↑      |
| PC.ae.C38.0          | 1.00          | 0.02    | ↑      | -0.06                       | 0.97    | -      | 0.93                           | 0.001   | ↑      |
| PC.ae.C38.2          | -0.90         | 0.09    | ↓      | -0.67                       | 0.14    | ↓      | -1.57                          | 0.02    | ↓      |
| PC.ae.C40.1          | -0.47         | 0.22    | -      | -1.07                       | 0.08    | ↓      | -1.54                          | 0.01    | ↓      |

|                      |       |       |   |       |        |   |       |         |   |
|----------------------|-------|-------|---|-------|--------|---|-------|---------|---|
| PC.ae.C40.2          | -0.17 | 0.72  | - | 1.25  | 0.01   | ↑ | 1.08  | 0.02    | ↑ |
| PC.ae.C40.4          | -0.74 | 0.02  | ↓ | -0.54 | 0.07   | - | -1.27 | 0.002   | ↓ |
| PC.ae.C40.5          | -1.26 | 0.06  | ↓ | -0.64 | 0.05   | - | -1.90 | 0.02    | ↓ |
| PC.ae.C42.3          | -0.73 | 0.11  | ↓ | -0.34 | 0.27   | - | -1.08 | 0.04    | ↓ |
| PC.ae.C42.4          | -5.75 | 0.01  | ↓ | -0.30 | 0.66   | - | -5.75 | 0.01    | ↓ |
| SM..OH..C14.1        | 1.22  | 0.01  | ↑ | 2.95  | 0.003  | ↑ | 4.17  | 0.002   | ↑ |
| SM..OH..C16.1        | 0.46  | 0.10  | - | 2.83  | 0.002  | ↑ | 3.28  | 0.002   | ↑ |
| SM..OH..C22.1        | 3.26  | 0.002 | ↑ | 3.09  | 0.002  | ↑ | 6.35  | 0.001   | ↑ |
| SM..OH..C22.2        | 1.55  | 0.07  | ↑ | 3.41  | 0.003  | ↑ | 4.95  | 0.002   | ↑ |
| SM..OH..C24.1        | 1.33  | 0.02  | ↑ | 1.88  | 0.001  | ↑ | 3.21  | 0.0003  | ↑ |
| SM.C16.0             | 0.62  | 0.05  | - | 2.94  | 0.002  | ↑ | 3.56  | 0.002   | ↑ |
| SM.C16.1             | 1.84  | 0.04  | ↑ | 3.14  | 0.002  | ↑ | 4.98  | 0.001   | ↑ |
| SM.C18.0             | 1.38  | 0.004 | ↑ | 2.82  | 0.003  | ↑ | 4.20  | 0.002   | ↑ |
| SM.C18.1             | 0.10  | 0.67  | - | 2.92  | 0.003  | ↑ | 3.02  | 0.003   | ↑ |
| SM.C24.0             | 1.92  | 0.004 | ↑ | 2.59  | 0.002  | ↑ | 4.50  | 0.001   | ↑ |
| SM.C24.1             | 2.45  | 0.03  | ↑ | 3.78  | 0.002  | ↑ | 6.23  | 0.001   | ↑ |
| SM.C26.0             | 1.40  | 0.04  | ↑ | 1.57  | 0.001  | ↑ | 2.97  | 0.00004 | ↑ |
| SM.C26.1             | -0.16 | 0.64  | - | 2.62  | 0.01   | ↑ | 2.46  | 0.01    | ↑ |
| C18                  | 0.99  | 0.001 | ↑ | 1.31  | 0.0003 | ↑ | 2.30  | 0.0002  | ↑ |
| C18.1                | 1.20  | 0.16  | ↑ | -0.15 | 0.75   | - | 1.04  | 0.002   | ↑ |
| citrulline           | 1.15  | 0.05  | ↑ | 0.15  | 0.88   | - | 1.30  | 0.002   | ↑ |
| glycine              | 0.43  | 0.21  | - | 0.57  | 0.14   | - | 1.01  | 0.001   | ↑ |
| isoleucine           | 0.61  | 0.16  | - | 0.49  | 0.24   | - | 1.10  | 0.001   | ↑ |
| leucine              | 0.51  | 0.22  | - | 0.38  | 0.40   | - | 0.89  | 0.002   | ↑ |
| lysine               | 0.60  | 0.16  | - | 0.54  | 0.22   | - | 1.14  | 0.0002  | ↑ |
| methionine           | 0.72  | 0.16  | ↑ | 0.25  | 0.68   | - | 0.97  | 0.01    | ↑ |
| phenylalanine        | 0.53  | 0.22  | - | 0.42  | 0.40   | - | 0.96  | 0.002   | ↑ |
| serine               | 0.65  | 0.09  | ↑ | 0.60  | 0.10   | - | 1.25  | 0.0004  | ↑ |
| threonine            | 0.32  | 0.36  | - | 0.54  | 0.22   | - | 0.86  | 0.002   | ↑ |
| tryptophan           | 1.10  | 0.14  | ↑ | 0.24  | 0.82   | - | 1.34  | 0.001   | ↑ |
| tyrosine             | 0.54  | 0.24  | - | 0.30  | 0.63   | - | 0.84  | 0.004   | ↑ |
| valine               | 0.77  | 0.13  | ↑ | 0.41  | 0.43   | - | 1.17  | 0.001   | ↑ |
| methionine.sulfoxide | 0.44  | 0.19  | - | 0.30  | 0.43   | - | 0.74  | 0.002   | ↑ |
| lysoPC.a.C14.0       | 0.55  | 0.003 | - | 0.40  | 0.003  | - | 0.95  | 0.0001  | ↑ |
| lysoPC.a.C16.0       | 0.91  | 0.09  | ↑ | 0.91  | 0.04   | ↑ | 1.82  | 0.001   | ↑ |
| lysoPC.a.C17.0       | -0.28 | 0.88  | - | 1.06  | 0.01   | ↑ | 0.79  | 0.02    | ↑ |
| lysoPC.a.C18.0       | -0.07 | 0.72  | - | 1.76  | 0.01   | ↑ | 1.68  | 0.002   | ↑ |
| lysoPC.a.C18.1       | 0.24  | 0.30  | - | 0.42  | 0.05   | - | 0.66  | 0.003   | ↑ |
| lysoPC.a.C20.4       | 1.06  | 0.01  | ↑ | -0.02 | 0.88   | - | 1.03  | 0.002   | ↑ |
| lysoPC.a.C24.0       | -1.49 | 0.01  | ↓ | 0.38  | 0.01   | - | -1.12 | 0.01    | ↓ |
| lysoPC.a.C26.0       | -1.54 | 0.003 | ↓ | 0.38  | 0.11   | - | -1.16 | 0.01    | ↓ |
| lysoPC.a.C26.1       | -1.29 | 0.01  | ↓ | 0.14  | 0.43   | - | -1.15 | 0.01    | ↓ |
| PC.aa.C28.1          | 0.66  | 0.03  | ↑ | 2.86  | 0.003  | ↑ | 3.52  | 0.003   | ↑ |
| PC.aa.C30.0          | 0.56  | 0.04  | - | 2.13  | 0.001  | ↑ | 2.69  | 0.001   | ↑ |
| PC.aa.C32.0          | 0.85  | 0.11  | ↑ | 1.16  | 0.01   | ↑ | 2.01  | 0.00003 | ↑ |
| PC.aa.C34.4          | -1.34 | 0.01  | ↓ | 0.09  | 0.69   | - | -1.25 | 0.01    | ↓ |
| PC.aa.C36.1          | -0.48 | 0.39  | - | 1.55  | 0.004  | ↑ | 1.08  | 0.02    | ↑ |
| PC.aa.C36.5          | -1.86 | 0.01  | ↓ | -0.22 | 0.22   | - | -2.08 | 0.01    | ↓ |
| PC.aa.C38.0          | 0.41  | 0.06  | - | 0.44  | 0.08   | - | 0.85  | 0.004   | ↑ |
| PC.aa.C40.4          | -0.13 | 0.84  | - | -0.96 | 0.04   | ↓ | -1.08 | 0.03    | ↓ |
| PC.ae.C30.0          | -0.14 | 0.73  | - | 0.90  | 0.001  | ↑ | 0.76  | 0.001   | ↑ |
| PC.ae.C34.3          | -2.08 | 0.03  | ↓ | -0.16 | 0.63   | - | -2.24 | 0.03    | ↓ |
| PC.ae.C36.0          | 0.24  | 0.12  | - | 1.40  | 0.004  | ↑ | 1.64  | 0.001   | ↑ |
| PC.ae.C36.1          | -0.12 | 0.68  | - | 1.55  | 0.01   | ↑ | 1.43  | 0.01    | ↑ |
| PC.ae.C38.0          | 1.00  | 0.02  | ↑ | -0.06 | 0.97   | - | 0.93  | 0.001   | ↑ |
| PC.ae.C38.2          | -0.90 | 0.09  | ↑ | -0.67 | 0.14   | ↓ | -1.57 | 0.02    | ↓ |
| PC.ae.C40.1          | -0.47 | 0.22  | - | -1.07 | 0.08   | ↓ | -1.54 | 0.01    | ↓ |
| PC.ae.C40.2          | -0.17 | 0.72  | - | 1.25  | 0.01   | ↑ | 1.08  | 0.02    | ↑ |
| PC.ae.C40.4          | -0.74 | 0.02  | ↓ | -0.54 | 0.07   | - | -1.27 | 0.002   | ↓ |
| PC.ae.C40.5          | -1.26 | 0.06  | ↓ | -0.64 | 0.05   | - | -1.90 | 0.02    | ↓ |
| PC.ae.C42.3          | -0.73 | 0.11  | ↓ | -0.34 | 0.27   | - | -1.08 | 0.04    | ↓ |
| PC.ae.C42.4          | -5.75 | 0.01  | ↓ | -0.30 | 0.66   | - | -5.75 | 0.01    | ↓ |
| SM..OH..C14.1        | 1.22  | 0.01  | ↑ | 2.95  | 0.003  | ↑ | 4.17  | 0.002   | ↑ |
| SM..OH..C16.1        | 0.46  | 0.10  | - | 2.83  | 0.002  | ↑ | 3.28  | 0.002   | ↑ |
| SM..OH..C22.1        | 3.26  | 0.002 | ↑ | 3.09  | 0.002  | ↑ | 6.35  | 0.001   | ↑ |
| SM..OH..C22.2        | 1.55  | 0.07  | ↑ | 3.41  | 0.003  | ↑ | 4.95  | 0.002   | ↑ |

|              |       |       |   |       |        |   |      |         |   |
|--------------|-------|-------|---|-------|--------|---|------|---------|---|
| SM.OH..C24.1 | 1.33  | 0.02  | ↑ | 1.88  | 0.001  | ↑ | 3.21 | 0.0003  | ↑ |
| SM.C16.0     | 0.62  | 0.05  | - | 2.94  | 0.002  | ↑ | 3.56 | 0.002   | ↑ |
| SM.C16.1     | 1.84  | 0.04  | ↑ | 3.14  | 0.002  | ↑ | 4.98 | 0.001   | ↑ |
| SM.C18.0     | 1.38  | 0.004 | ↑ | 2.82  | 0.003  | ↑ | 4.20 | 0.002   | ↑ |
| SM.C18.1     | 0.10  | 0.67  | - | 2.92  | 0.003  | ↑ | 3.02 | 0.003   | ↑ |
| SM.C24.0     | 1.92  | 0.004 | ↑ | 2.59  | 0.002  | ↑ | 4.50 | 0.001   | ↑ |
| SM.C24.1     | 2.45  | 0.03  | ↑ | 3.78  | 0.002  | ↑ | 6.23 | 0.001   | ↑ |
| SM.C26.0     | 1.40  | 0.04  | ↑ | 1.57  | 0.001  | ↑ | 2.97 | 0.00004 | ↑ |
| SM.C26.1     | -0.16 | 0.64  | - | 2.62  | 0.01   | ↑ | 2.46 | 0.01    | ↑ |
| C18          | 0.99  | 0.001 | ↑ | 1.31  | 0.0003 | ↑ | 2.30 | 0.0002  | ↑ |
| C18.1        | 1.20  | 0.16  | ↑ | -0.15 | 0.75   | - | 1.04 | 0.002   | ↑ |

**Table S4.** Biochemical parameters of different groups.

|                   | Normal |      | DIO   |      | DIO-CCl <sub>4</sub> |      | OCA   |      |
|-------------------|--------|------|-------|------|----------------------|------|-------|------|
|                   | Mean   | SEM  | Mean  | SEM  | Mean                 | SEM  | Mean  | SEM  |
| ALP (U/L)         | 156.8  | 6.97 | 112.9 | 4.19 | 121.9                | 3.08 | 116.1 | 3.70 |
| TP (g/L)          | 46.7   | 0.68 | 45.6  | 0.71 | 47.8                 | 0.8  | 48.1  | 0.73 |
| ALB (g/L)         | 15.8   | 0.35 | 15.4  | 0.3  | 17.1                 | 0.33 | 17.1  | 0.23 |
| BUN (mmol/L)      | 10.6   | 0.24 | 9.00  | 0.36 | 9.43                 | 0.32 | 9.48  | 0.41 |
| CREA (umol/L)     | 10.8   | 0.67 | 12.4  | 0.69 | 12.1                 | 0.45 | 9.81  | 0.46 |
| UA (umol/L)       | 59.5   | 6.05 | 66.4  | 5.72 | 81.8                 | 9.43 | 69.1  | 10.9 |
| CHOL (mmol/l)     | 1.97   | 0.07 | 3.17  | 0.17 | 2.54                 | 0.14 | 2.34  | 0.06 |
| Serum TG (mmol/L) | 0.32   | 0.03 | 0.25  | 0.01 | 0.61                 | 0.09 | 0.34  | 0.03 |
| Liver TG (umol/g) | 21.5   | 1.8  | 41.6  | 7.3  | 46.6                 | 3.2  | 13.4  | 1.3  |
| HDL-C (mmol/L)    | 1.55   | 0.06 | 2.43  | 0.12 | 1.84                 | 0.07 | 1.87  | 0.04 |
| LDL-C (mmol/L)    | 0.17   | 0.01 | 0.36  | 0.04 | 0.27                 | 0.04 | 0.28  | 0.07 |

**Table S5.** Body weights prior to the onset of treatment (CCl<sub>4</sub>) .

|                   | Control    | DIO          | DIO-CCl <sub>4</sub> | OCA        |
|-------------------|------------|--------------|----------------------|------------|
| Pre-treatment (g) | 26.3 ± 0.4 | 31.0 ± 0.8** | 30.9 ± 0.4           | 30.7 ± 0.5 |

Results are mean ± SE (*n* = 8). \*\**p* < 0.01 versus normal mice.
